# Supplementary material for: Didymellanosine, a new decahydrofluorene analogue, and ascolactone C from Didymella sp. IEA-3B.1, an endophyte of Terminalia catappa
Source: Royal Society of Chemistry journal article supplement (doi:10.1039/c9ra10685e), 2020-01-01
Supplement: c9ra10685e1.pdf [file c9ra10685e1.pdf]

## Supporting Information

### **Didymellanosine, A New Decahydrofluorene Analogue, and Ascolactone C from *Didymella* sp. IEA-3B.1, an Endophyte of *Terminalia catappa***

Ni P. Ariantari,<sup>a,b</sup> Elena Ancheeva,<sup>a</sup> Marian Frank,<sup>a</sup> Fabian Stuhldreier,<sup>c</sup> Dieter Meier,<sup>a</sup> Yvonne Gröner,<sup>a</sup> Irene Reimche,<sup>d</sup> Nicole Teusch,<sup>d</sup> Sebastian Wesselborg,<sup>c</sup> Werner E. G. Müller,<sup>e</sup> Rainer Kalscheuer,<sup>a</sup> Zhen Liu,<sup>a,\*</sup> Peter Proksch<sup>a,f,\*</sup>

<sup>a</sup>*Institute of Pharmaceutical Biology and Biotechnology, Heinrich Heine University Düsseldorf, Universitätsstrasse 1, 40225 Düsseldorf, Germany. E-mail: zhenfeizi0@sina.com (Z.L.), proksch@uni-duesseldorf.de (P.P.)*

<sup>b</sup>*Department of Pharmacy, Faculty of Mathematics and Natural Sciences, Udayana University, 80361 Bali, Indonesia*

<sup>c</sup>*Institute of Molecular Medicine I, Medical Faculty, Heinrich Heine University Düsseldorf, Universitätsstrasse 1, 40225 Düsseldorf, Germany*

<sup>d</sup>*Department of Biomedical Sciences, Institute of Health Research and Education, University of Osnabrück, Germany*

<sup>e</sup>*Institute for Physiological Chemistry, University Medical Center of the Johannes Gutenberg University Mainz, Duesbergweg 6, 55128 Mainz, Germany*

<sup>f</sup>*Hubei Key Laboratory of Natural Products Research and Development, College of Biological and Pharmaceutical Sciences, China Three Gorges University, Yichang 443002, People's Republic of China*

## Table of Contents

|                                                                                                                                                                                                                                                                                 | Page |
|---------------------------------------------------------------------------------------------------------------------------------------------------------------------------------------------------------------------------------------------------------------------------------|------|
| <b>Figure S1.</b> HPLC chromatograms of EtOAc extract of <i>Didymella</i> sp. IEA-3B.1 cultured on rice medium (black) compared to the OSMAC culture on rice medium with addition of 3.5 g (NH <sub>4</sub> ) <sub>2</sub> SO <sub>4</sub> (blue) under UV detection at 235 nm. | 3    |
| <b>Figure S2.</b> An endophytic <i>Didymella</i> sp. IEA-3B.1 cultured on rice medium (A) and on rice medium with addition of 3.5 g (NH <sub>4</sub> ) <sub>2</sub> SO <sub>4</sub> (B).                                                                                        | 3    |
| <b>Figure S3.</b> HPLC chromatogram (A) and UV spectrum (B) of compound <b>1</b> .                                                                                                                                                                                              | 4    |
| <b>Figure S4.</b> HRESIMS of compound <b>1</b> .                                                                                                                                                                                                                                | 4    |
| <b>Figure S5.</b> IR spectrum of compound <b>1</b> .                                                                                                                                                                                                                            | 5    |
| <b>Figure S6.</b> <sup>1</sup> H NMR (600 MHz, DMSO- <i>d</i> <sub>6</sub> ) spectrum of compound <b>1</b> .                                                                                                                                                                    | 5    |
| <b>Figure S7.</b> <sup>13</sup> C NMR (125 MHz, DMSO- <i>d</i> <sub>6</sub> ) spectrum of compound <b>1</b> .                                                                                                                                                                   | 6    |
| <b>Figure S8.</b> <sup>1</sup> H- <sup>1</sup> H COSY (600 MHz, DMSO- <i>d</i> <sub>6</sub> ) spectrum of compound <b>1</b> .                                                                                                                                                   | 6    |
| <b>Figure S9.</b> HSQC (600 and 125 MHz, DMSO- <i>d</i> <sub>6</sub> ) spectrum of compound <b>1</b> .                                                                                                                                                                          | 7    |
| <b>Figure S10.</b> HMBC (600 and 125 MHz, DMSO- <i>d</i> <sub>6</sub> ) spectrum of compound <b>1</b> .                                                                                                                                                                         | 7    |
| <b>Figure S11.</b> NOESY (600 MHz, DMSO- <i>d</i> <sub>6</sub> ) spectrum of compound <b>1</b> .                                                                                                                                                                                | 8    |
| <b>Figure S12.</b> HPLC chromatogram (A) and UV spectrum (B) of compound <b>4</b> .                                                                                                                                                                                             | 8    |
| <b>Figure S13.</b> HRESIMS of compound <b>4</b> .                                                                                                                                                                                                                               | 9    |
| <b>Figure S14.</b> IR spectrum of compound <b>4</b> .                                                                                                                                                                                                                           | 9    |
| <b>Figure S15.</b> <sup>1</sup> H NMR (600 MHz, (CD <sub>3</sub> ) <sub>2</sub> CO) spectrum of compound <b>4</b> .                                                                                                                                                             | 10   |
| <b>Figure S16.</b> <sup>1</sup> H NMR (600 MHz, MeOH- <i>d</i> <sub>4</sub> ) spectrum of compound <b>4</b> .                                                                                                                                                                   | 10   |
| <b>Figure S17.</b> <sup>1</sup> H- <sup>1</sup> H COSY (600 MHz, (CD <sub>3</sub> ) <sub>2</sub> CO) spectrum of compound <b>4</b> .                                                                                                                                            | 11   |
| <b>Figure S18.</b> HSQC (600 and 150 MHz, (CD <sub>3</sub> ) <sub>2</sub> CO) spectrum of compound <b>4</b> .                                                                                                                                                                   | 11   |
| <b>Figure S19.</b> HMBC (600 and 150 MHz, (CD <sub>3</sub> ) <sub>2</sub> CO) spectrum of compound <b>4</b> .                                                                                                                                                                   | 12   |
| <b>Figure S20.</b> NOESY (600 MHz, (CD <sub>3</sub> ) <sub>2</sub> CO) spectrum of compound <b>4</b> .                                                                                                                                                                          | 12   |
| <b>Figure S21.</b> HPLC chromatogram (A) and UV spectrum (B) of compound <b>11</b> .                                                                                                                                                                                            | 13   |
| <b>Figure S22.</b> HRESIMS of compound <b>11</b> .                                                                                                                                                                                                                              | 13   |
| <b>Figure S23.</b> <sup>1</sup> H NMR (600 MHz, DMSO- <i>d</i> <sub>6</sub> ) spectrum of compound <b>11</b> .                                                                                                                                                                  | 14   |
| <b>Figure S24.</b> <sup>13</sup> C NMR (150 MHz, DMSO- <i>d</i> <sub>6</sub> ) spectrum of compound <b>11</b> .                                                                                                                                                                 | 14   |
| <b>Figure S25.</b> <sup>1</sup> H- <sup>1</sup> H COSY (600 MHz, DMSO- <i>d</i> <sub>6</sub> ) spectrum of compound <b>11</b> .                                                                                                                                                 | 15   |
| <b>Figure S26.</b> HSQC (600 and 150 MHz, DMSO- <i>d</i> <sub>6</sub> ) spectrum of compound <b>11</b> .                                                                                                                                                                        | 15   |
| <b>Figure S27.</b> HMBC (600 and 150 MHz, DMSO- <i>d</i> <sub>6</sub> ) spectrum of compound <b>11</b> .                                                                                                                                                                        | 16   |
| <b>Figure S28.</b> NOESY (600 MHz, DMSO- <i>d</i> <sub>6</sub> ) spectrum of compound <b>11</b> .                                                                                                                                                                               | 16   |
| <b>Tabel S1.</b> <sup>1</sup> H and <sup>13</sup> C NMR data <sup>a</sup> (DMSO- <i>d</i> <sub>6</sub> ) for compound <b>11</b>                                                                                                                                                 | 17   |

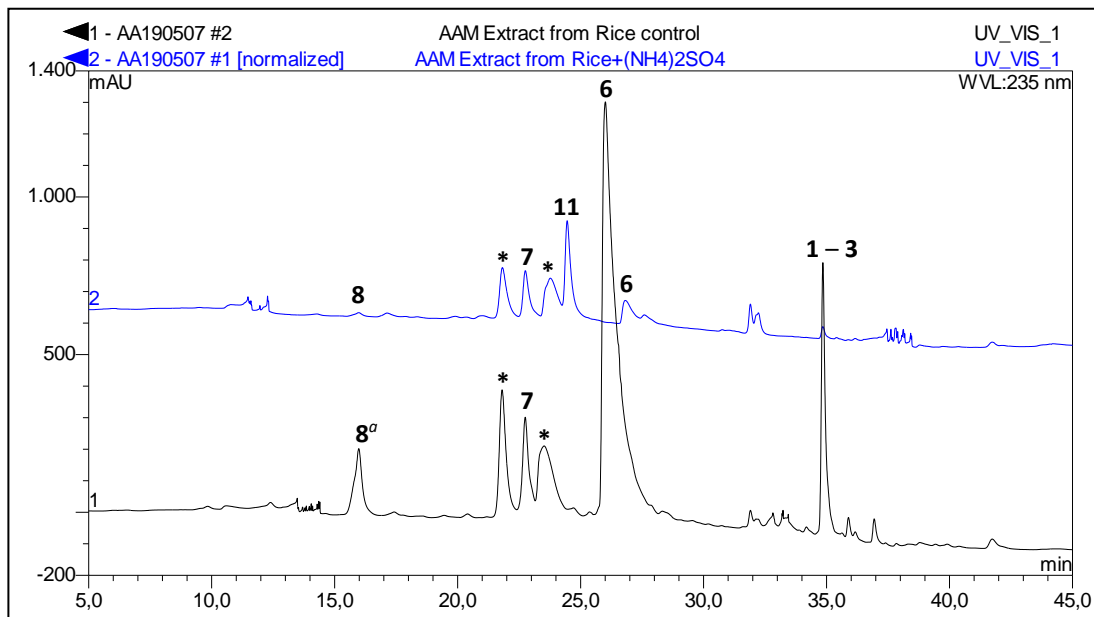

**Figure S1.** HPLC chromatograms of EtOAc extract of *Didymella* sp. IEA-3B.1 cultured on rice medium (black) compared to the OSMAC culture on rice medium with addition of 3.5 g  $(\text{NH}_4)_2\text{SO}_4$  (blue) under UV detection at 235 nm. (number refers to compound's number. \* unidentified peaks)

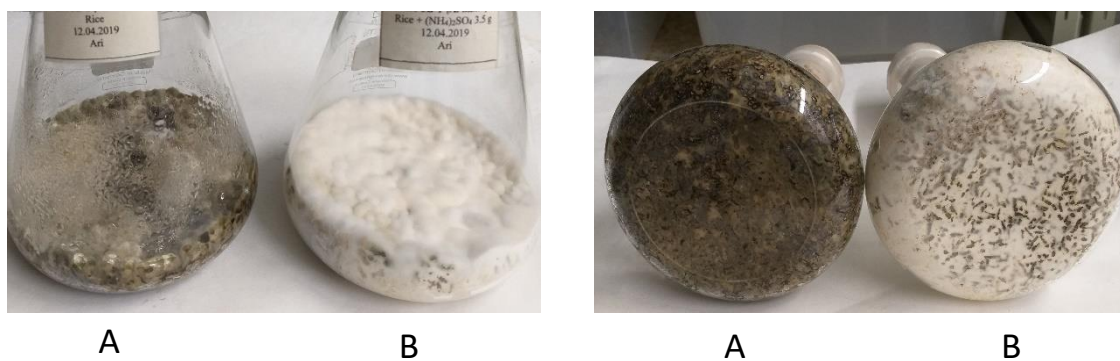

**Figure S2.** *Didymella* sp. IEA-3B.1 cultured on rice medium (A) and on rice medium with addition of 3.5 g  $(\text{NH}_4)_2\text{SO}_4$  (B).

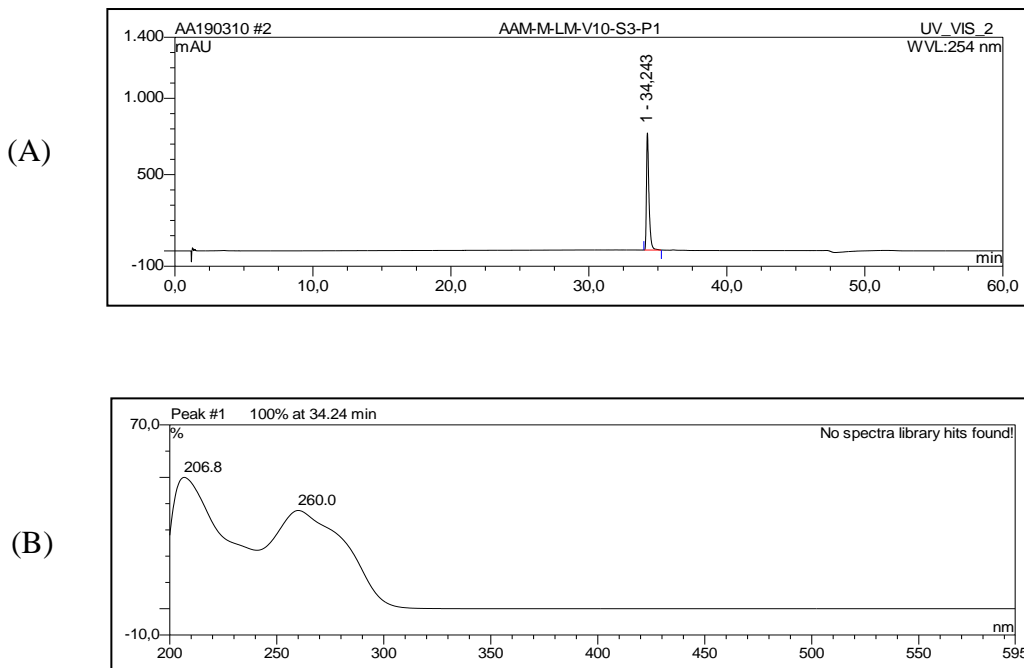

**Figure S3.** HPLC chromatogram (A) and UV spectrum (B) of compound **1**.

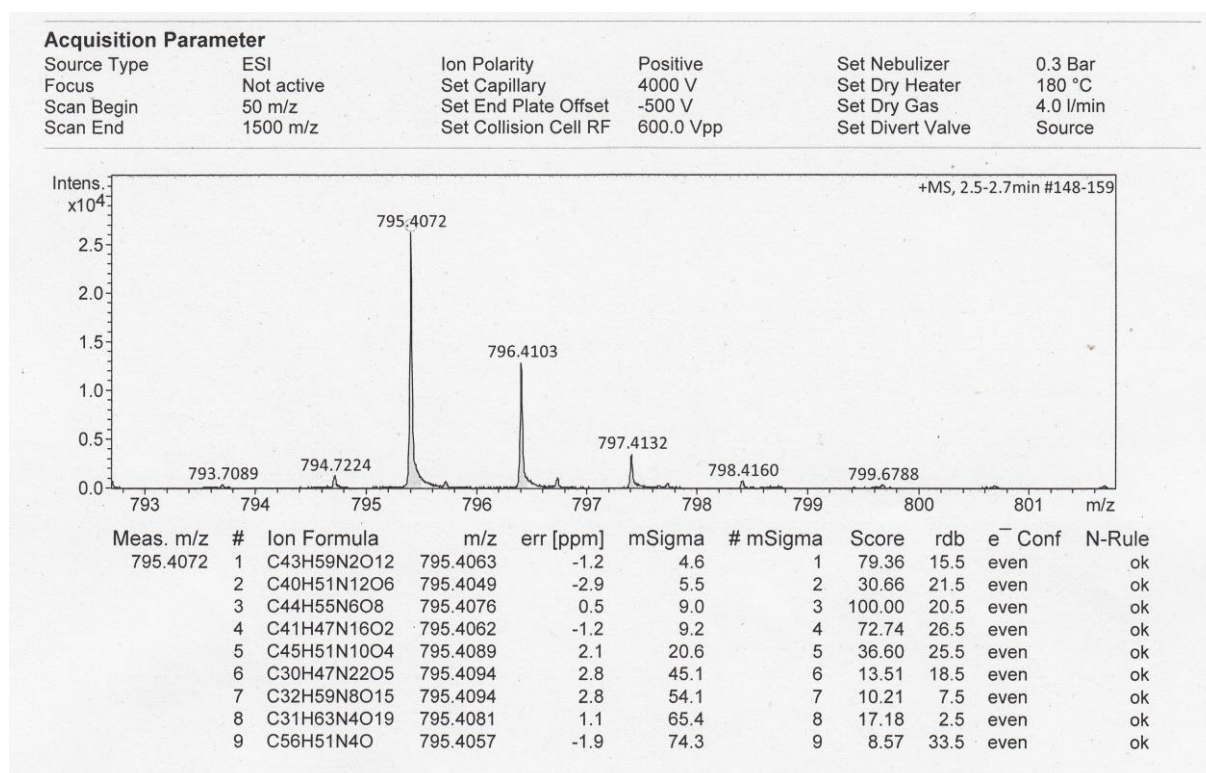

**Figure S4.** HRESIMS of compound **1**.

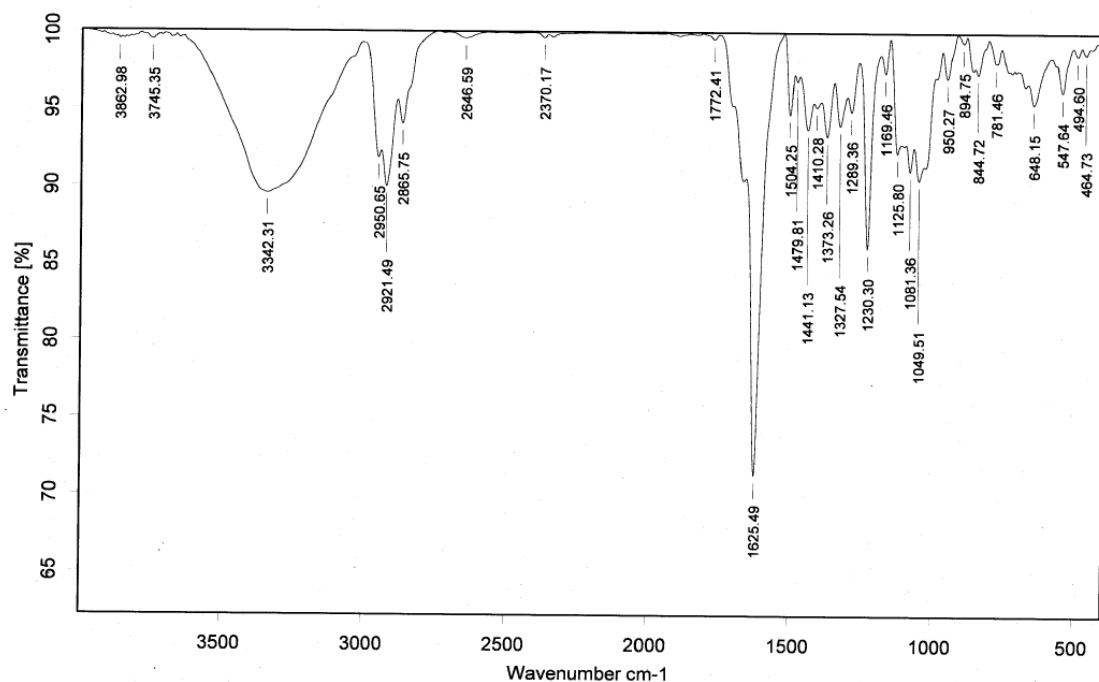

|                                |           |     |            |
|--------------------------------|-----------|-----|------------|
| C:\DATEN\2020\Proksch\Pro120.0 | AA-408-R3 | KBr | 10.01.2020 |
|--------------------------------|-----------|-----|------------|

Figure S5. IR spectrum of compound **1**.

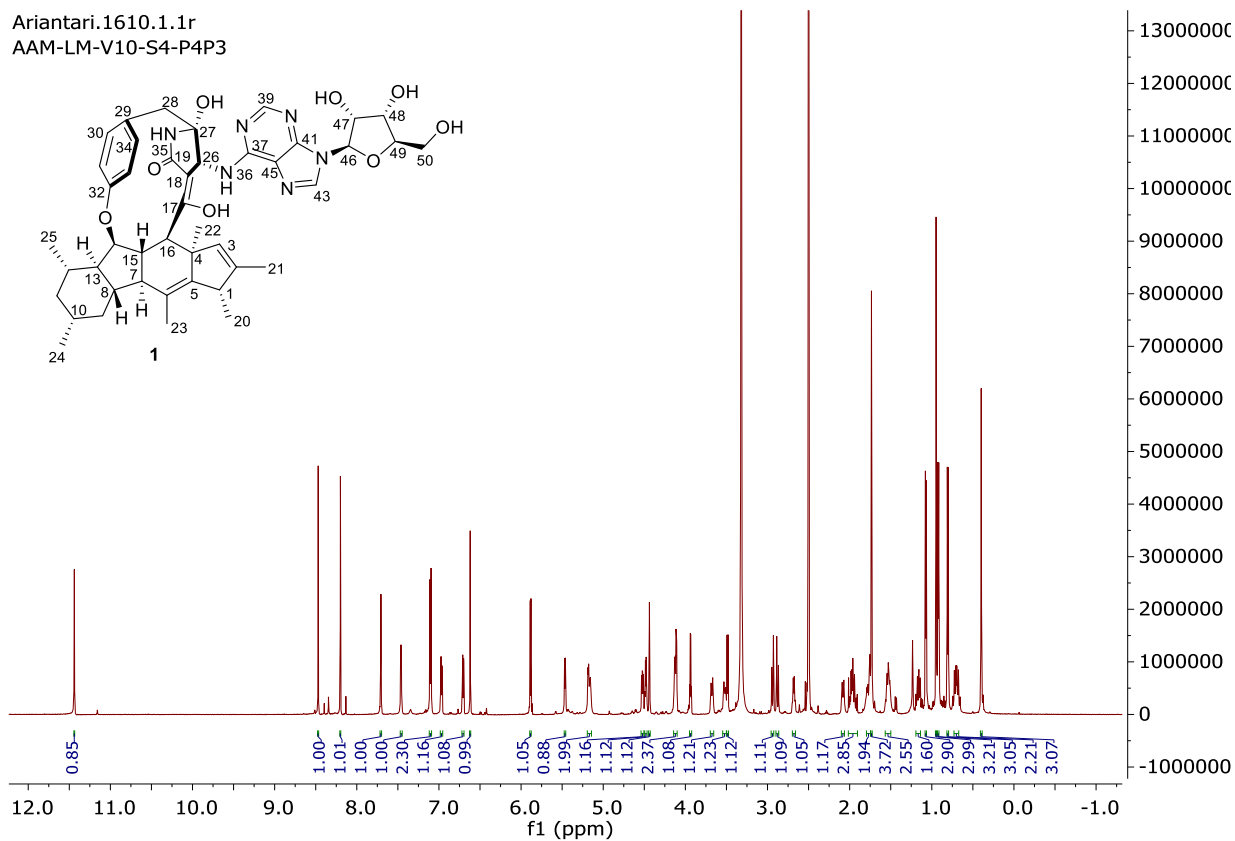

Figure S6. <sup>1</sup>H NMR (600 MHz, DMSO-*d*<sub>6</sub>) spectrum of compound **1**.

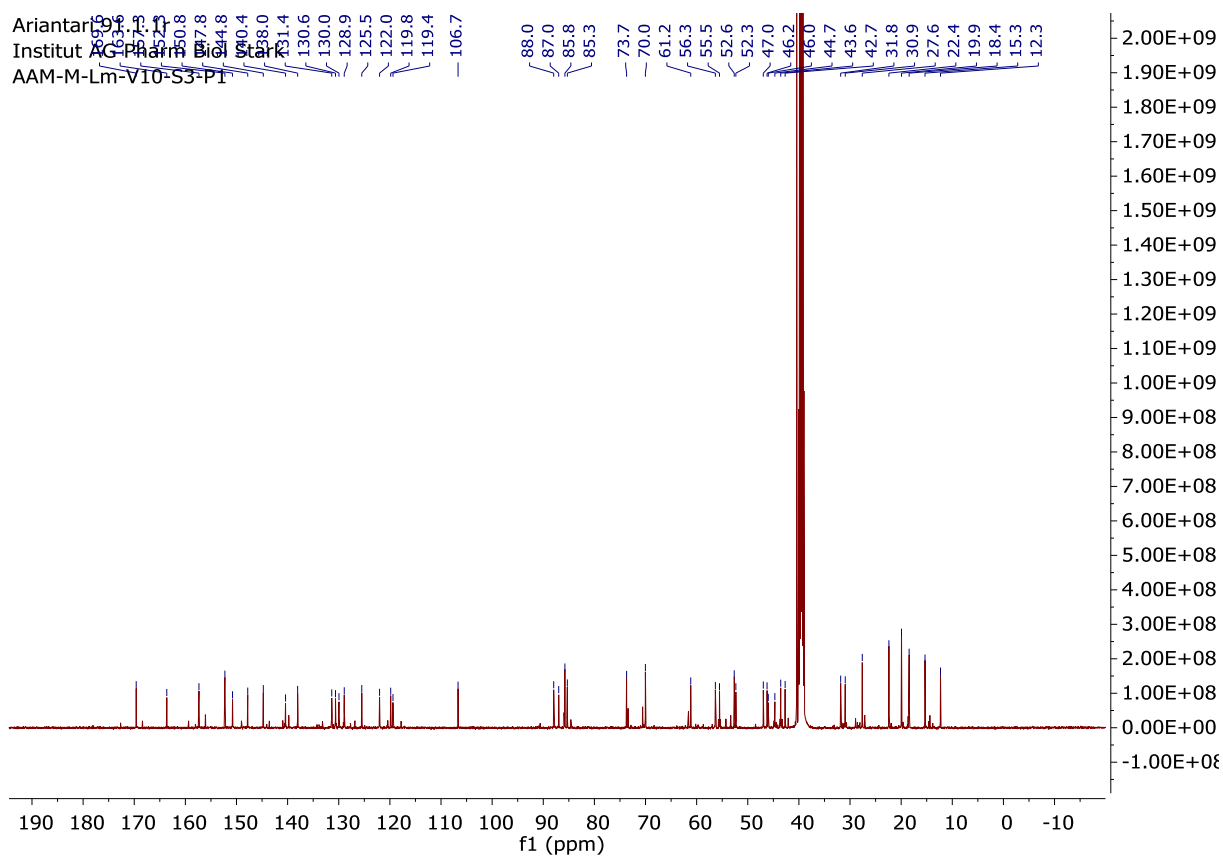

**Figure S7.**  $^{13}\text{C}$  NMR (125 MHz,  $\text{DMSO-}d_6$ ) spectrum of compound **1**.

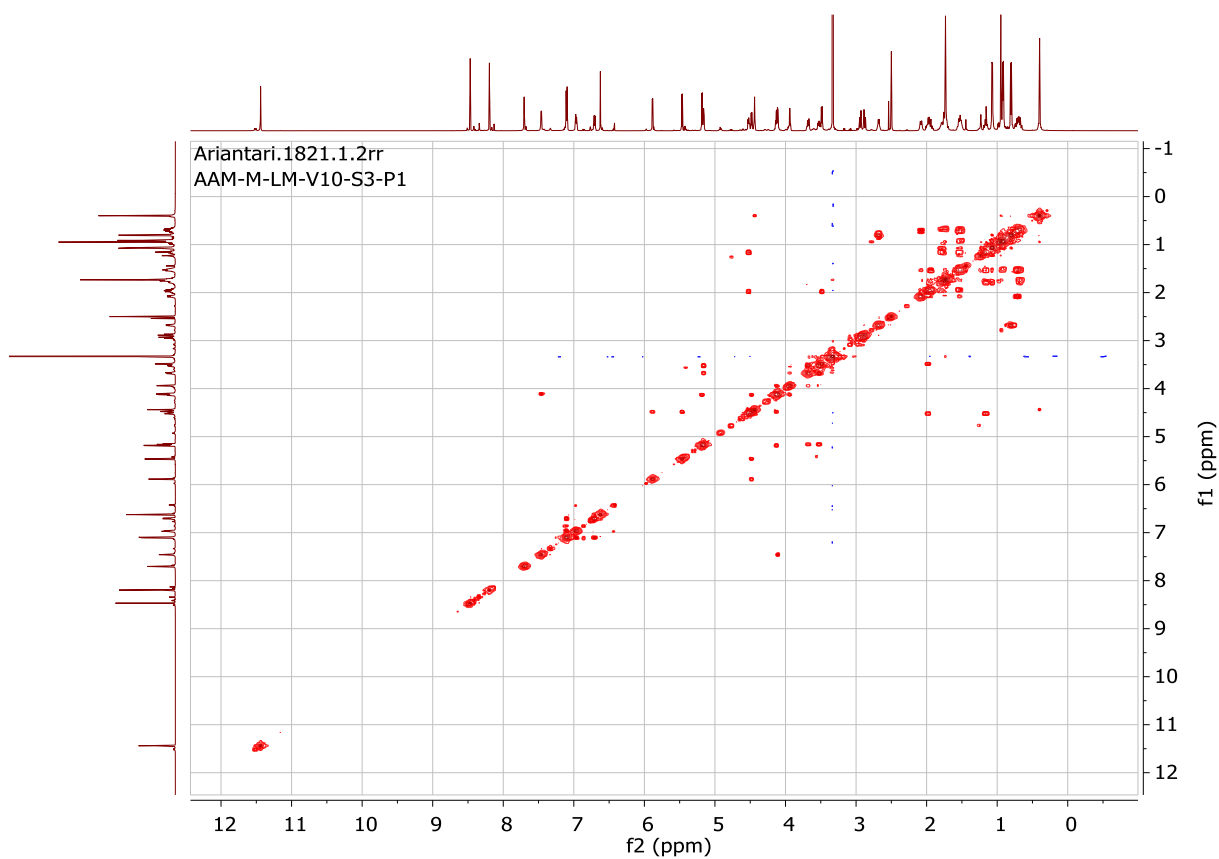

**Figure S8.**  $^1\text{H-}^1\text{H}$  COSY (600 MHz,  $\text{DMSO-}d_6$ ) spectrum of compound **1**.

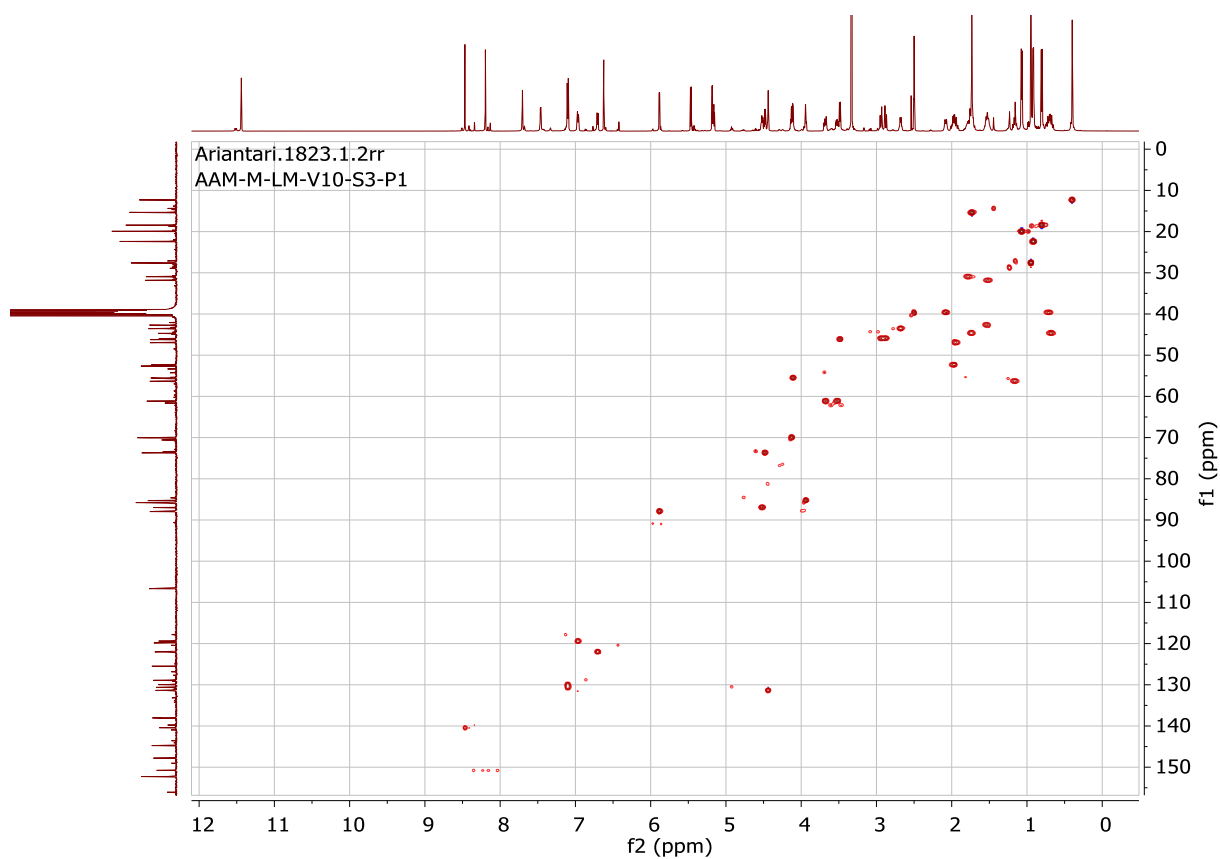

**Figure S9.** HSQC (600 and 125 MHz, DMSO-*d*<sub>6</sub>) spectrum of compound **1**.

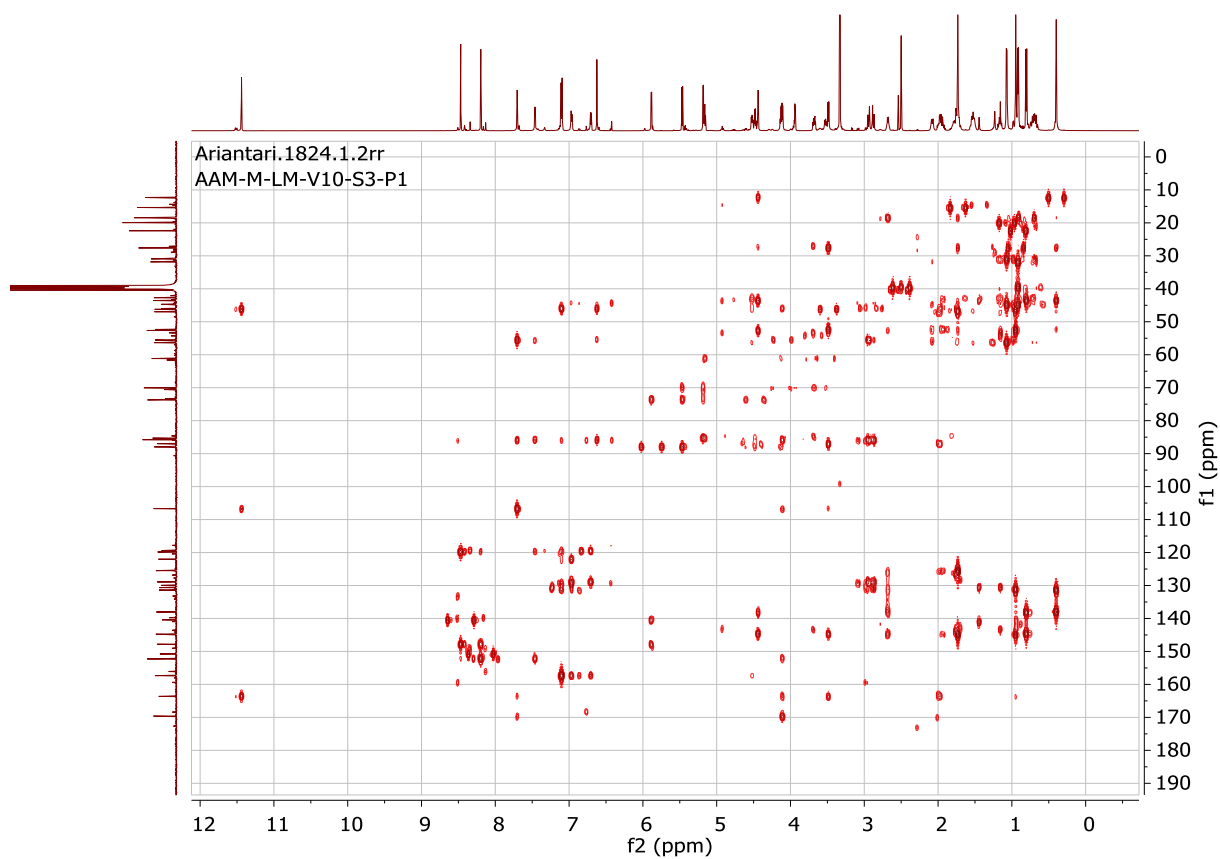

**Figure S10.** HMBC (600 and 125 MHz, DMSO-*d*<sub>6</sub>) spectrum of compound **1**.

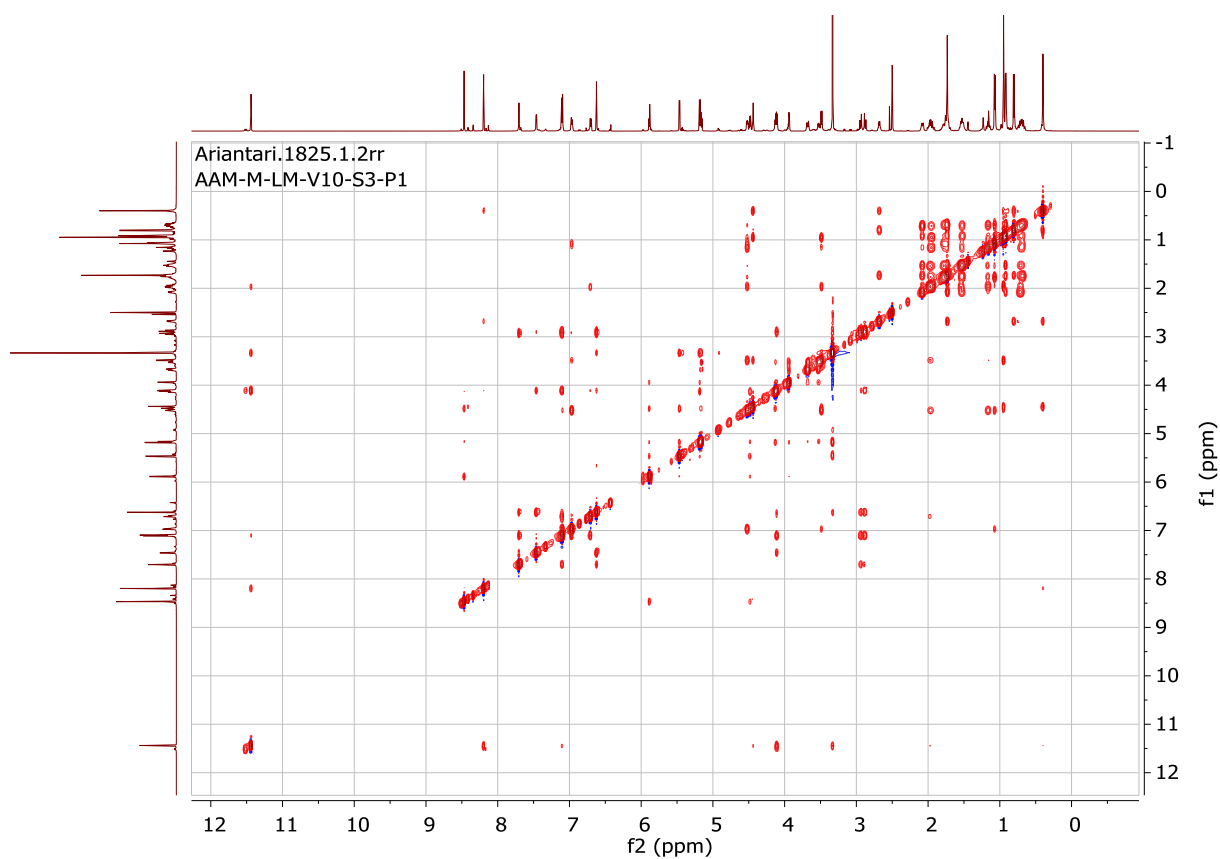

**Figure S11.** NOESY (600 MHz, DMSO-*d*<sub>6</sub>) spectrum of compound **1**.

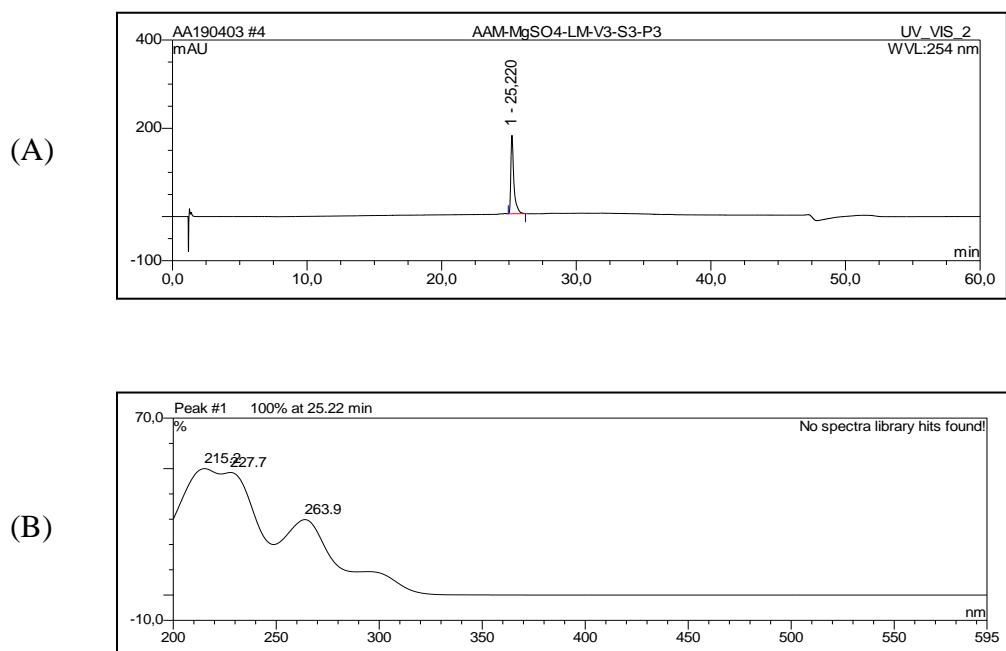

**Figure S12.** HPLC chromatogram (A) and UV spectrum (B) of compound **4**.



| Acquisition Parameter |            |                       |           |                  |           |
|-----------------------|------------|-----------------------|-----------|------------------|-----------|
| Source Type           | ESI        | Ion Polarity          | Positive  | Set Nebulizer    | 0.3 Bar   |
| Focus                 | Not active | Set Capillary         | 4000 V    | Set Dry Heater   | 180 °C    |
| Scan Begin            | 50 m/z     | Set End Plate Offset  | -500 V    | Set Dry Gas      | 4.0 l/min |
| Scan End              | 1500 m/z   | Set Collision Cell RF | 600.0 Vpp | Set Divert Valve | Source    |

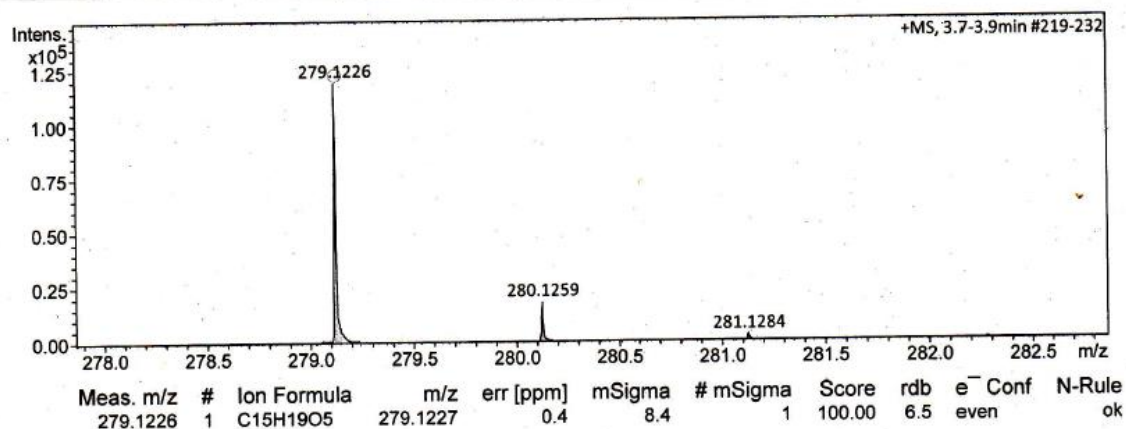

Figure S13. HRESIMS of compound 4.

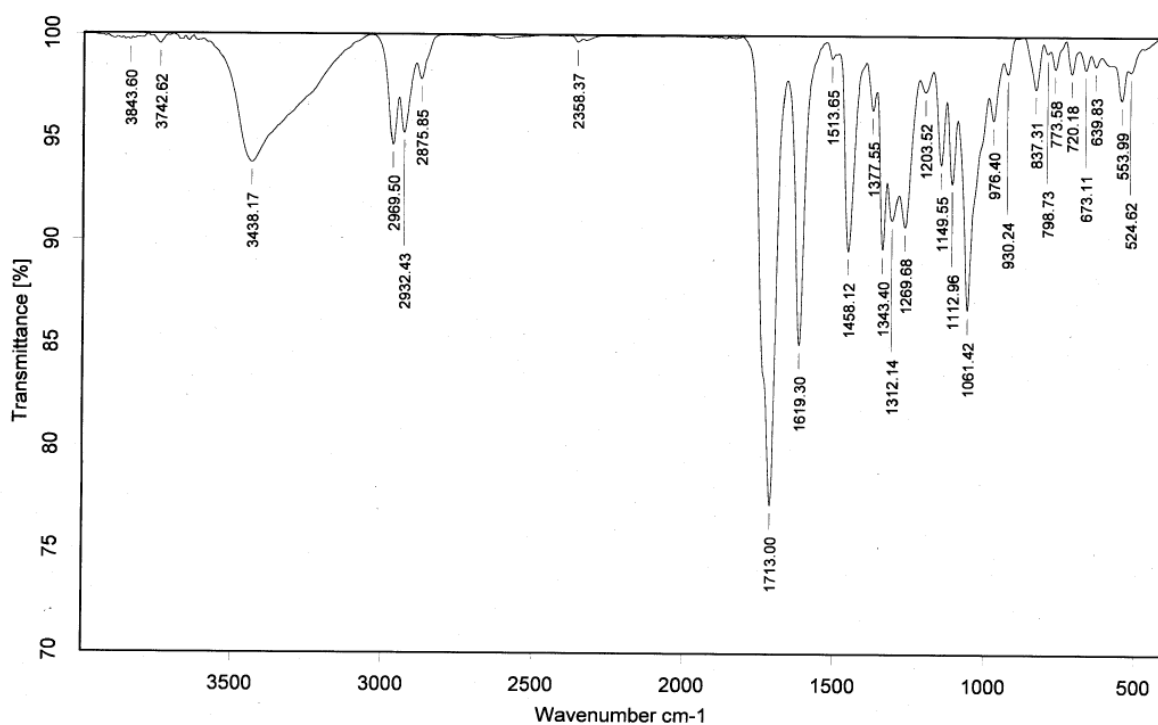

|                                 |          |     |            |
|---------------------------------|----------|-----|------------|
| C:\DATEN\2020\Prokschl\Pro121.0 | AA-M-411 | KBr | 13.01.2020 |
|---------------------------------|----------|-----|------------|

Figure S14. IR spectrum of compound 4.

Ariantari.1916.1.1r  
AAM-M9SO4-LM-V3-S3-P3

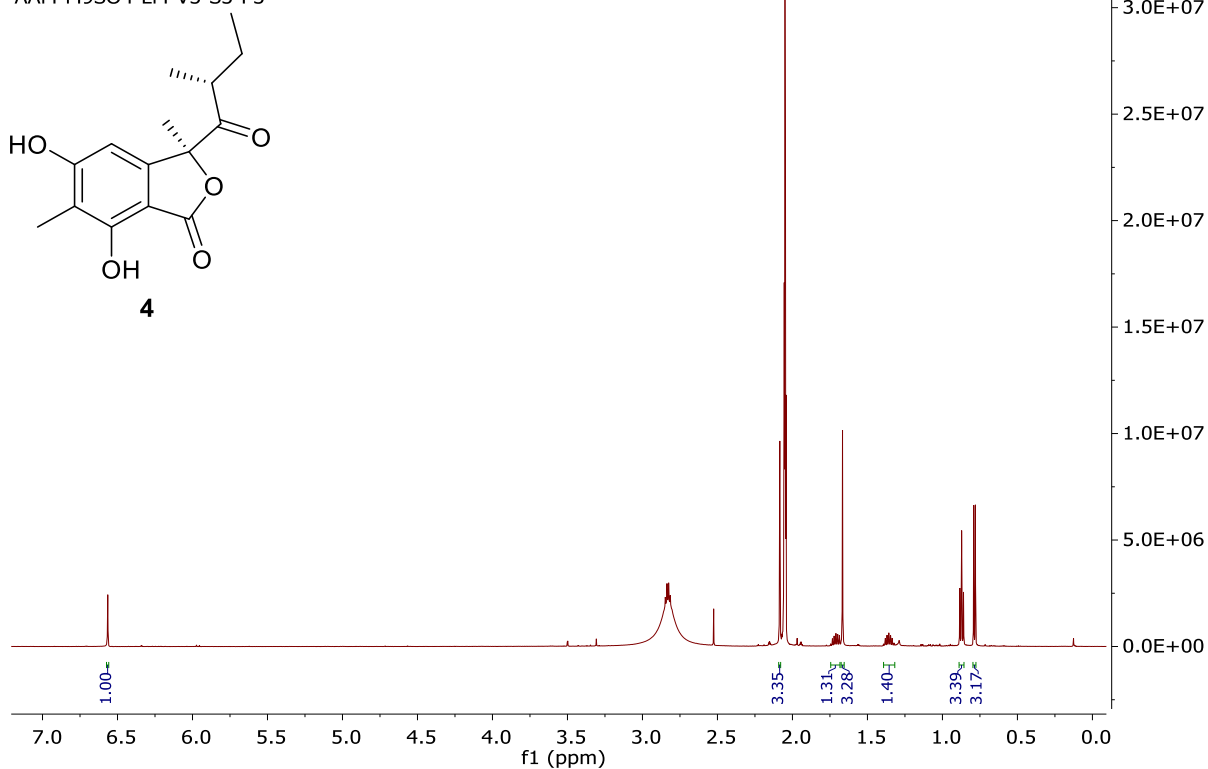

**Figure S15.**  $^1\text{H}$  NMR (600 MHz,  $(\text{CD}_3)_2\text{CO}$ ) spectrum of compound **4**.

Ariantari.2120.1.1r  
AAM - M - LM - V3 - S3 - P3

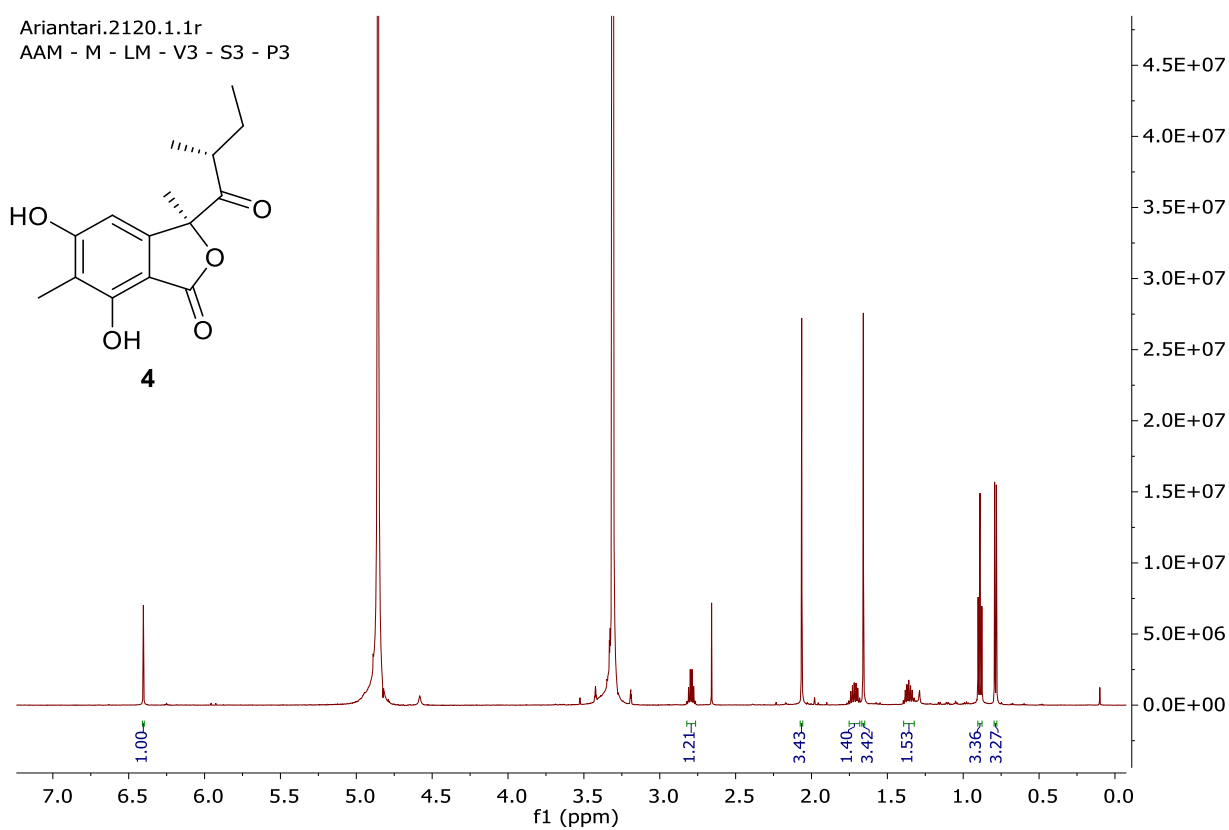

**Figure S16.**  $^1\text{H}$  NMR (600 MHz,  $\text{MeOH-}d_4$ ) spectrum of compound **4**.

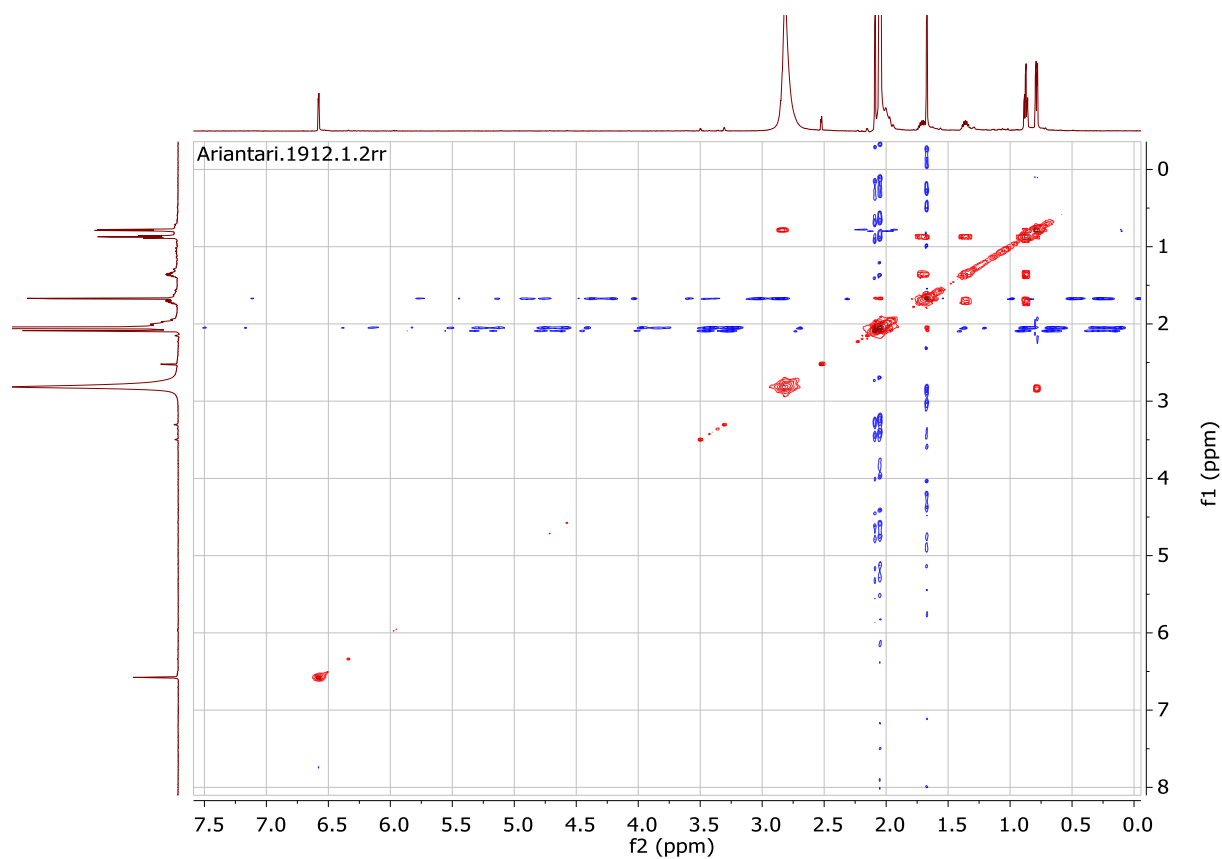

**Figure S17.**  $^1\text{H}$ - $^1\text{H}$  COSY (600 MHz,  $(\text{CD}_3)_2\text{CO}$ ) spectrum of compound **4**.

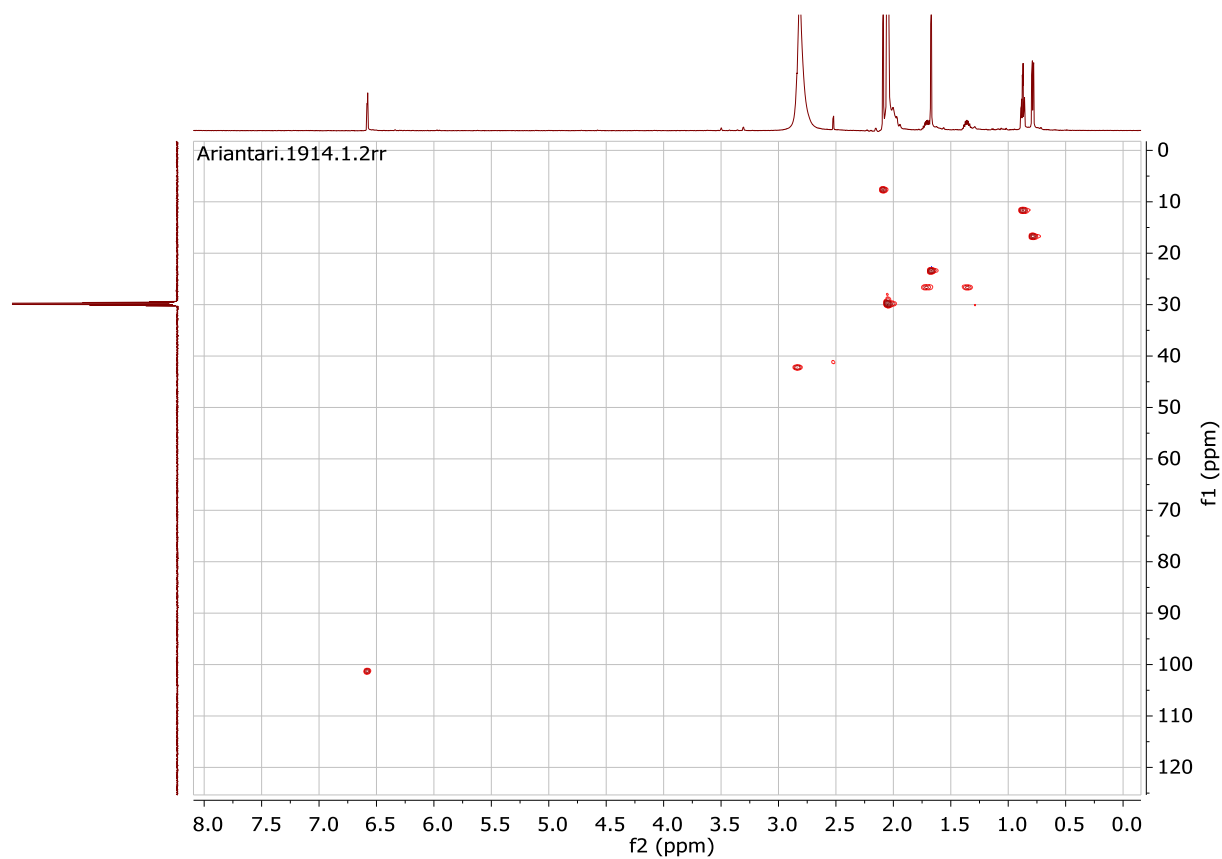

**Figure S18.** HSQC (600 and 150 MHz,  $(\text{CD}_3)_2\text{CO}$ ) spectrum of compound **4**.

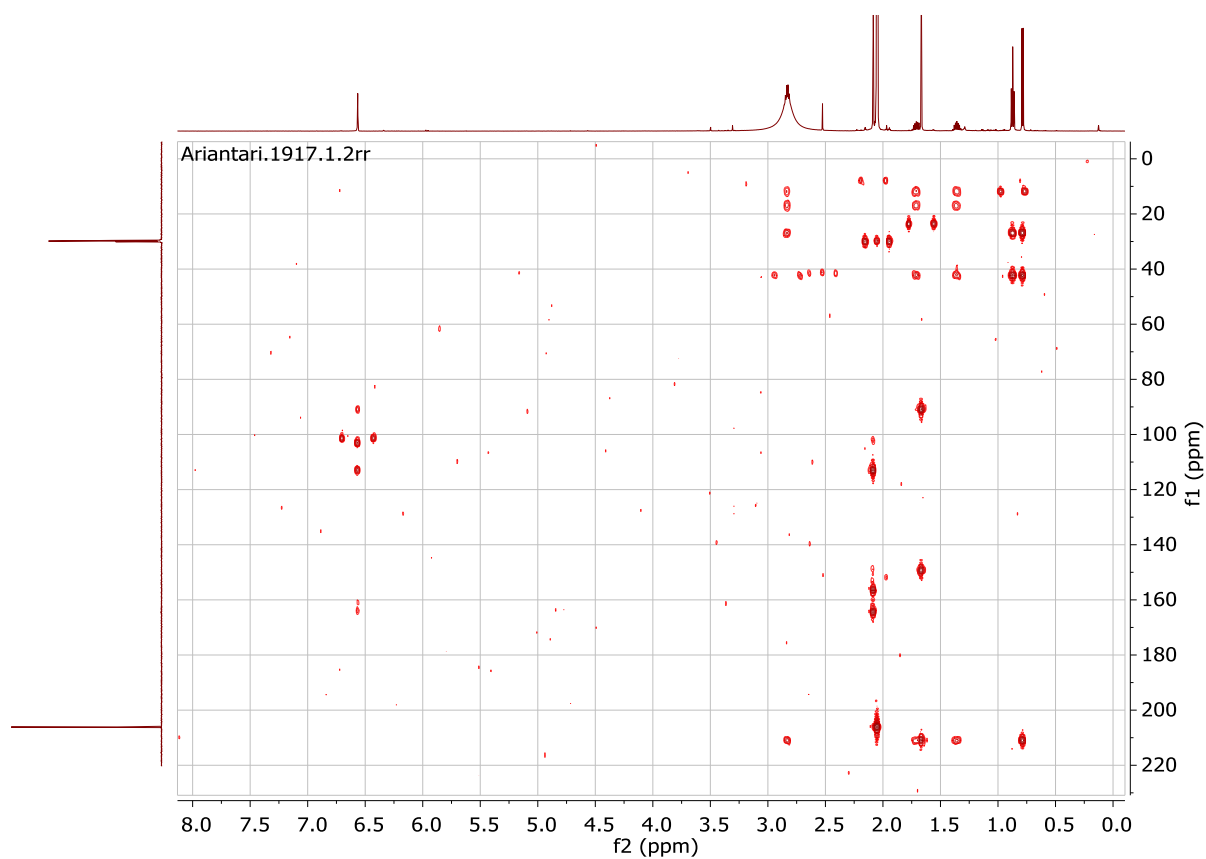

**Figure S19.** HMBC (600 and 150 MHz,  $(\text{CD}_3)_2\text{CO}$ ) spectrum of compound **4**.

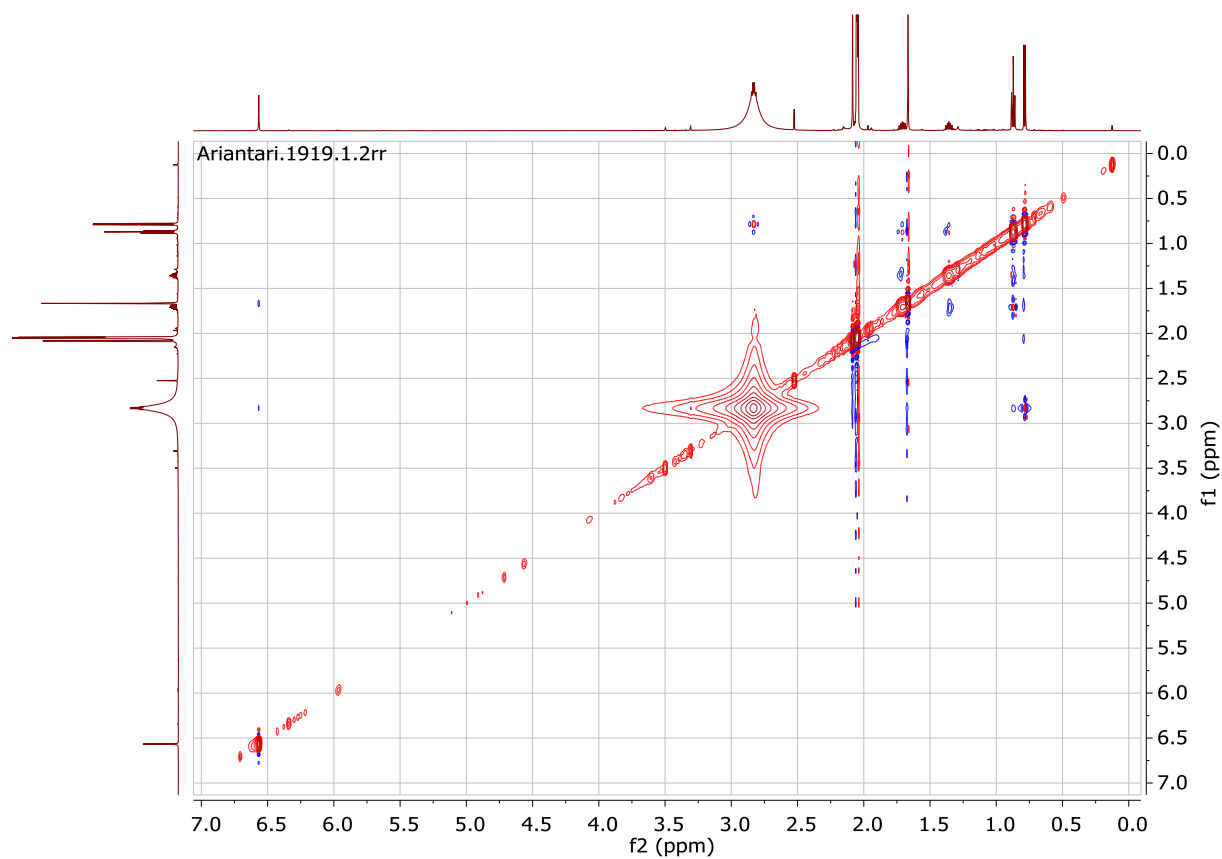

**Figure S20.** NOESY (600 MHz,  $(\text{CD}_3)_2\text{CO}$ ) spectrum of compound **4**.

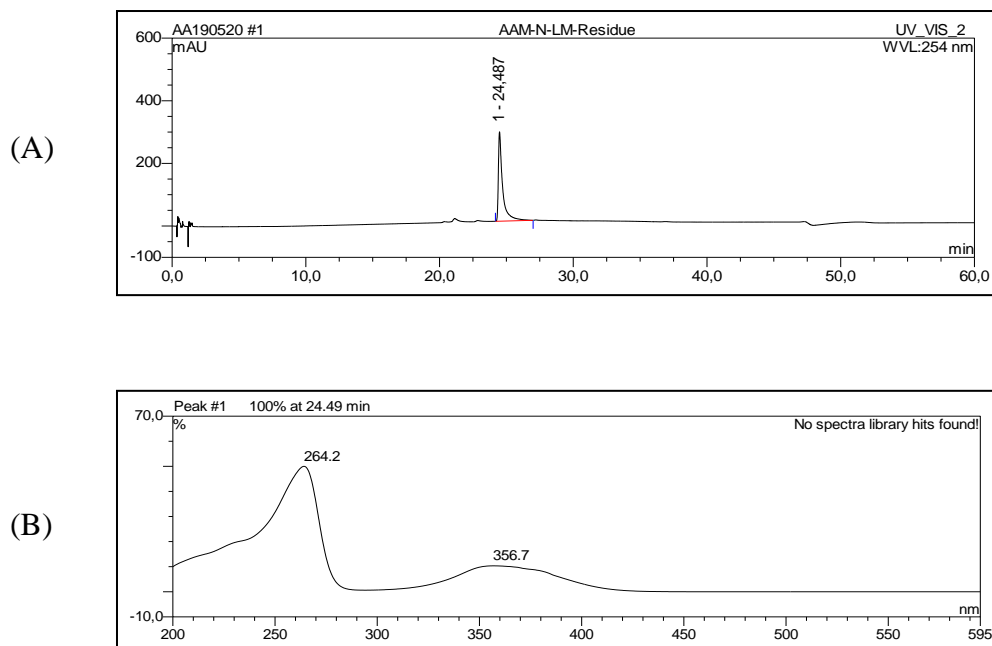

**Figure S21.** HPLC chromatogram (A) and UV spectrum (B) of compound **11**.

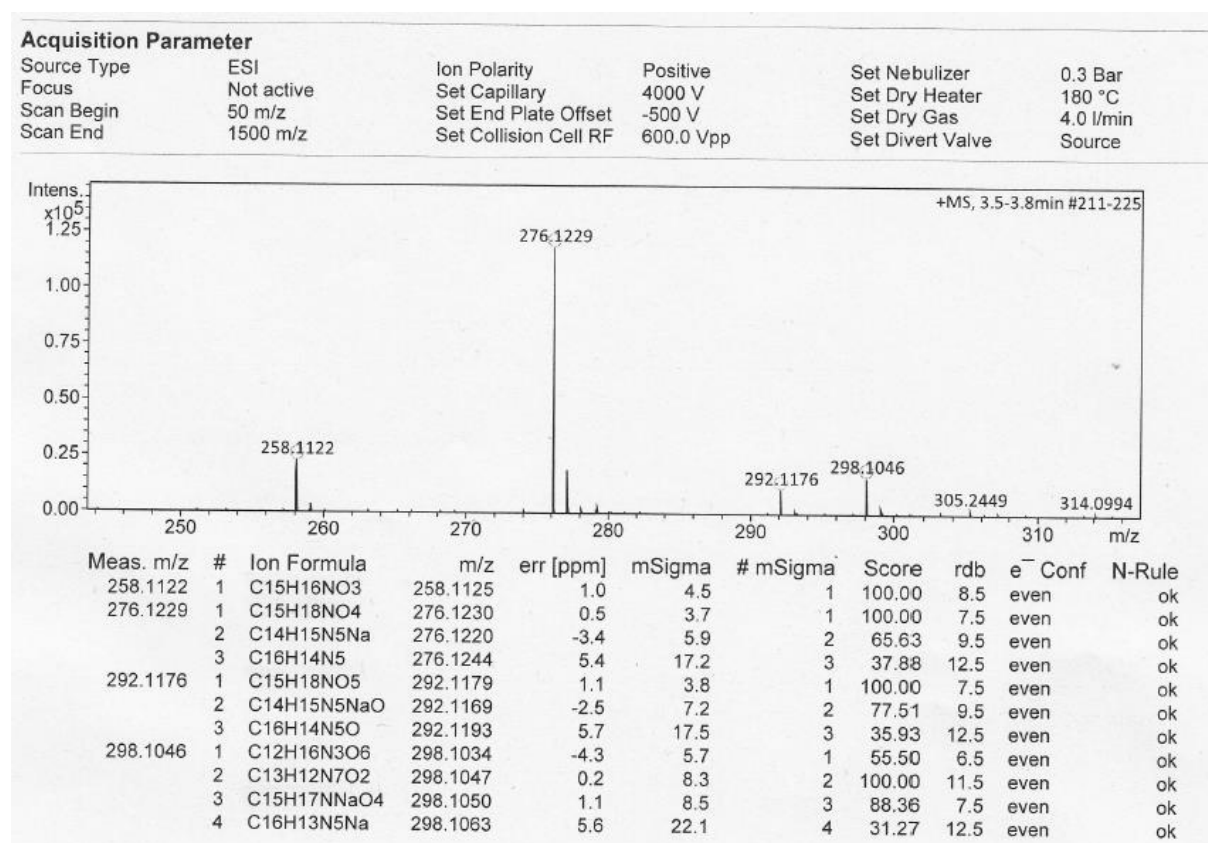

**Figure S22.** HRESIMS spectrum of compound **11**.

Ariantari.2582.1.1r  
AAM(NH4)2SO40LM-Residue  
Messung bei 60 Grad Celsius

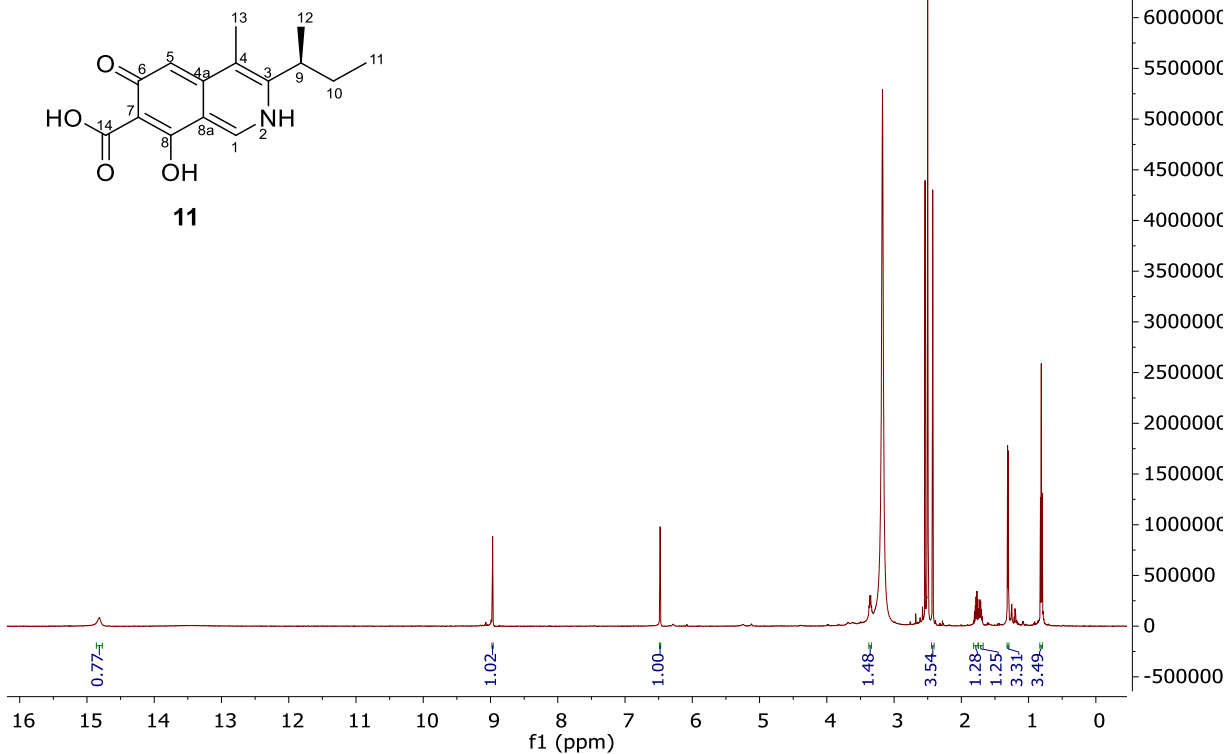

**Figure S23.** <sup>1</sup>H NMR (600 MHz, DMSO-*d*<sub>6</sub>) spectrum of compound **11**.

Ariantari.2604.1.1r  
AAM- (NH4)2SO4- LM-Residue  
Messung bei 60 Grad Celsius

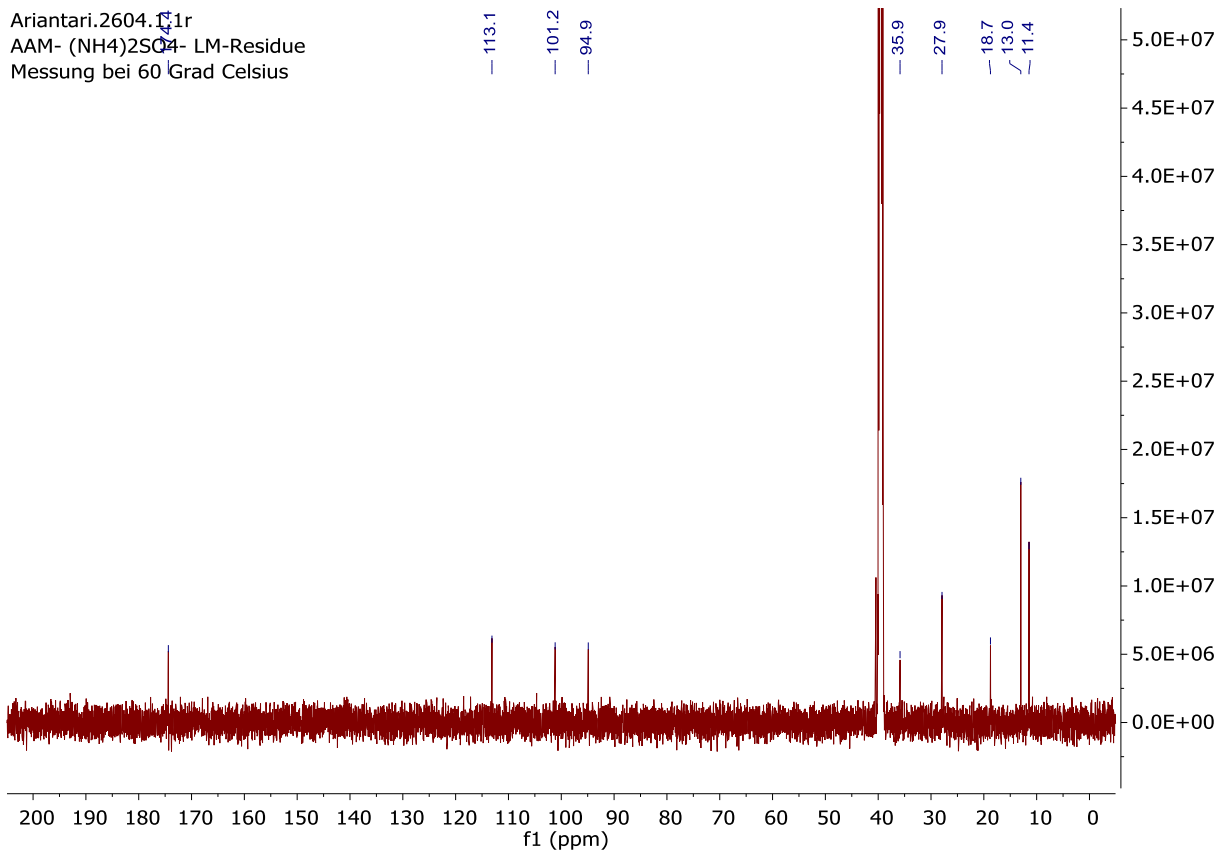

**Figure S24.** <sup>13</sup>C NMR (150 MHz, DMSO-*d*<sub>6</sub>) spectrum of compound **11**.

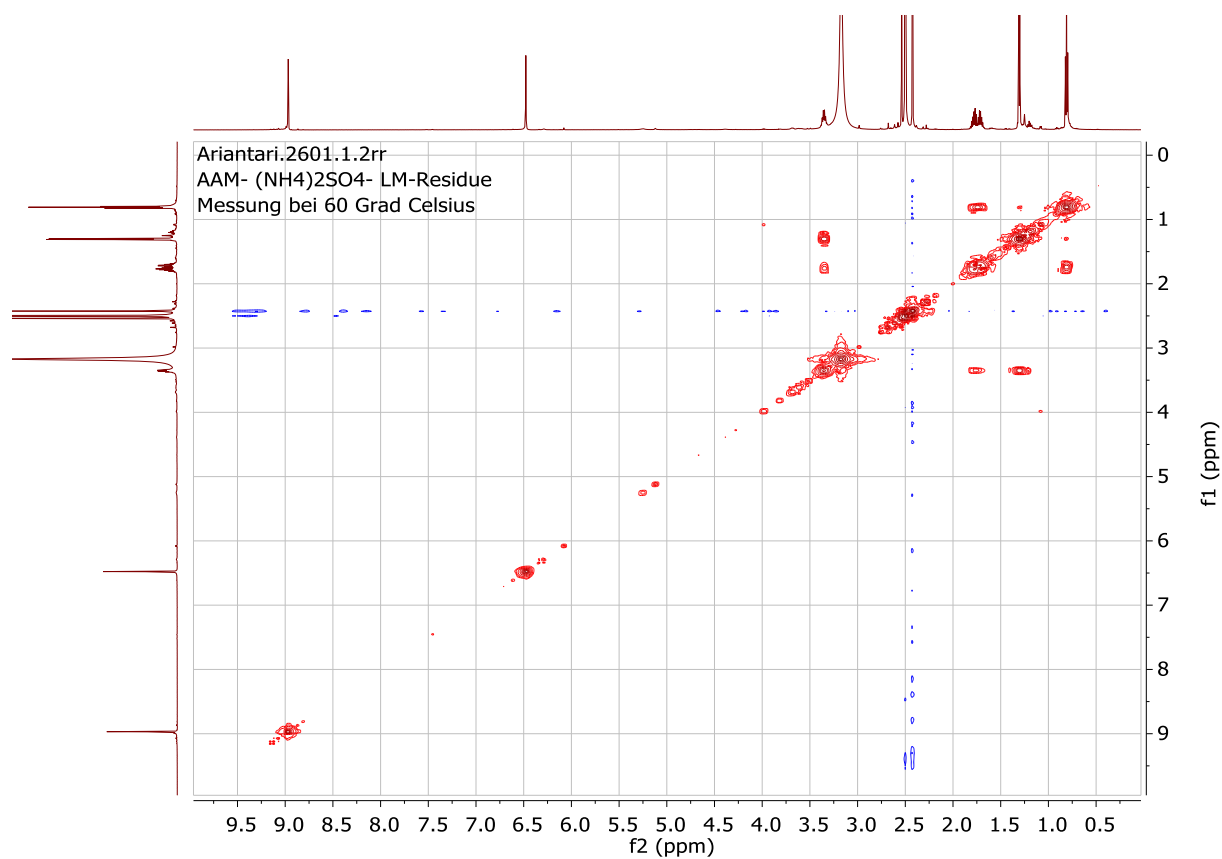

**Figure S25.** <sup>1</sup>H-<sup>1</sup>H COSY (600 MHz, DMSO-*d*<sub>6</sub>) spectrum of compound **11**.

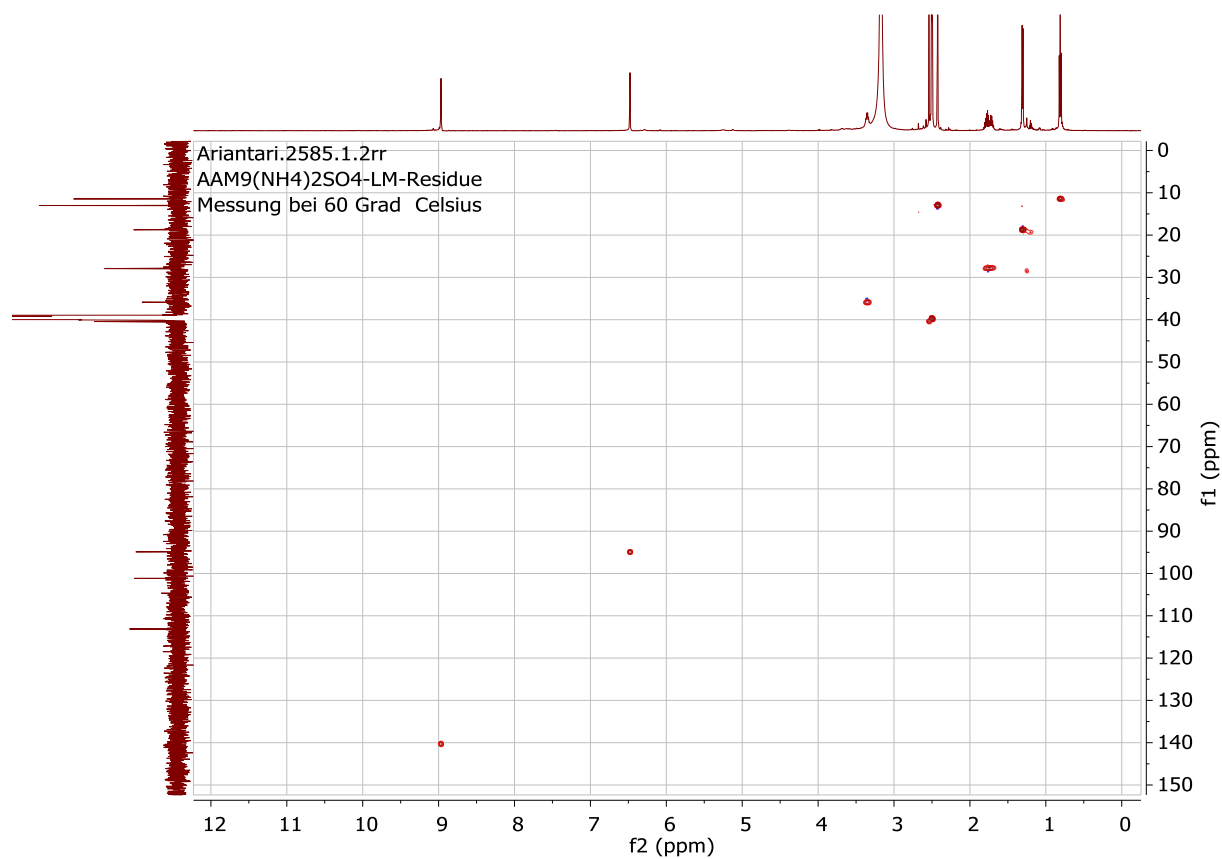

**Figure S26.** HSQC (600 and 150 MHz, DMSO-*d*<sub>6</sub>) spectrum of compound **11**.

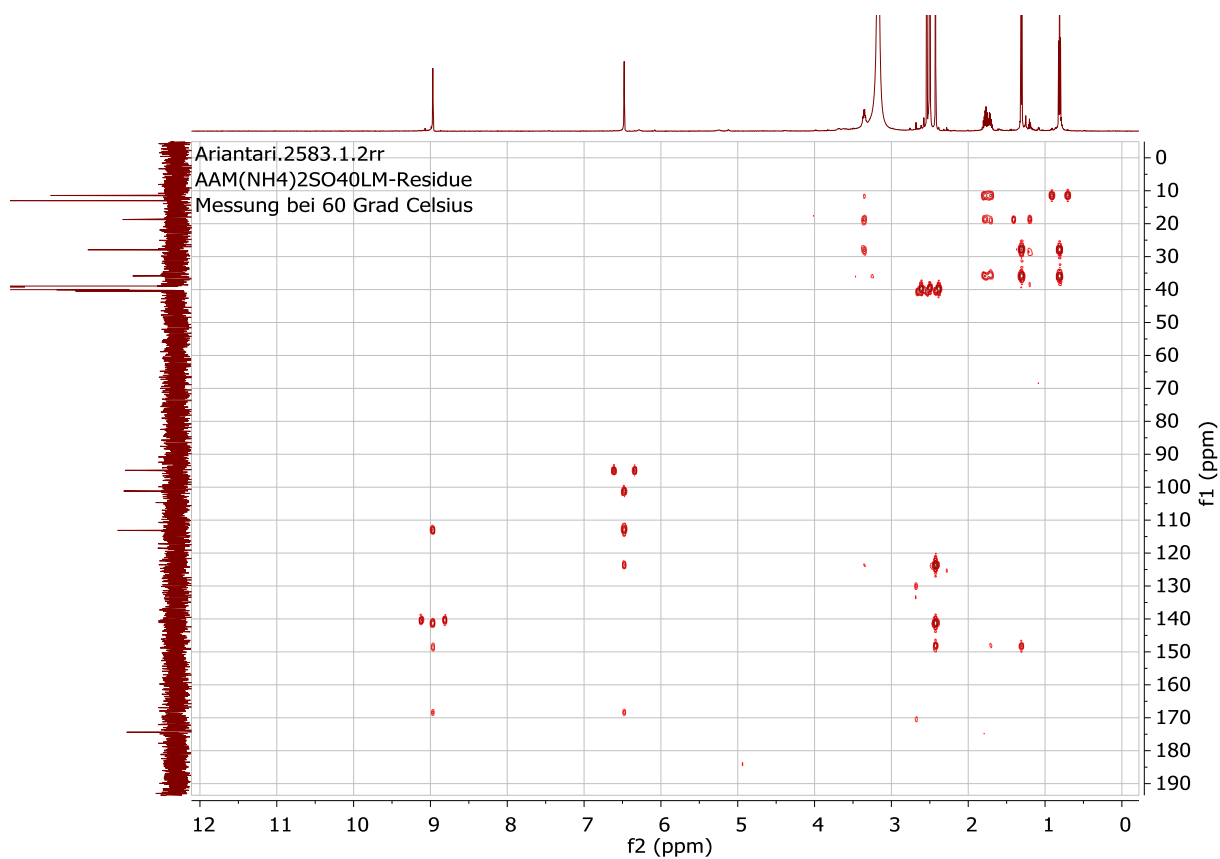

**Figure S27.** HMBC (600 and 150 MHz, DMSO- $d_6$ ) spectrum of compound **11**.

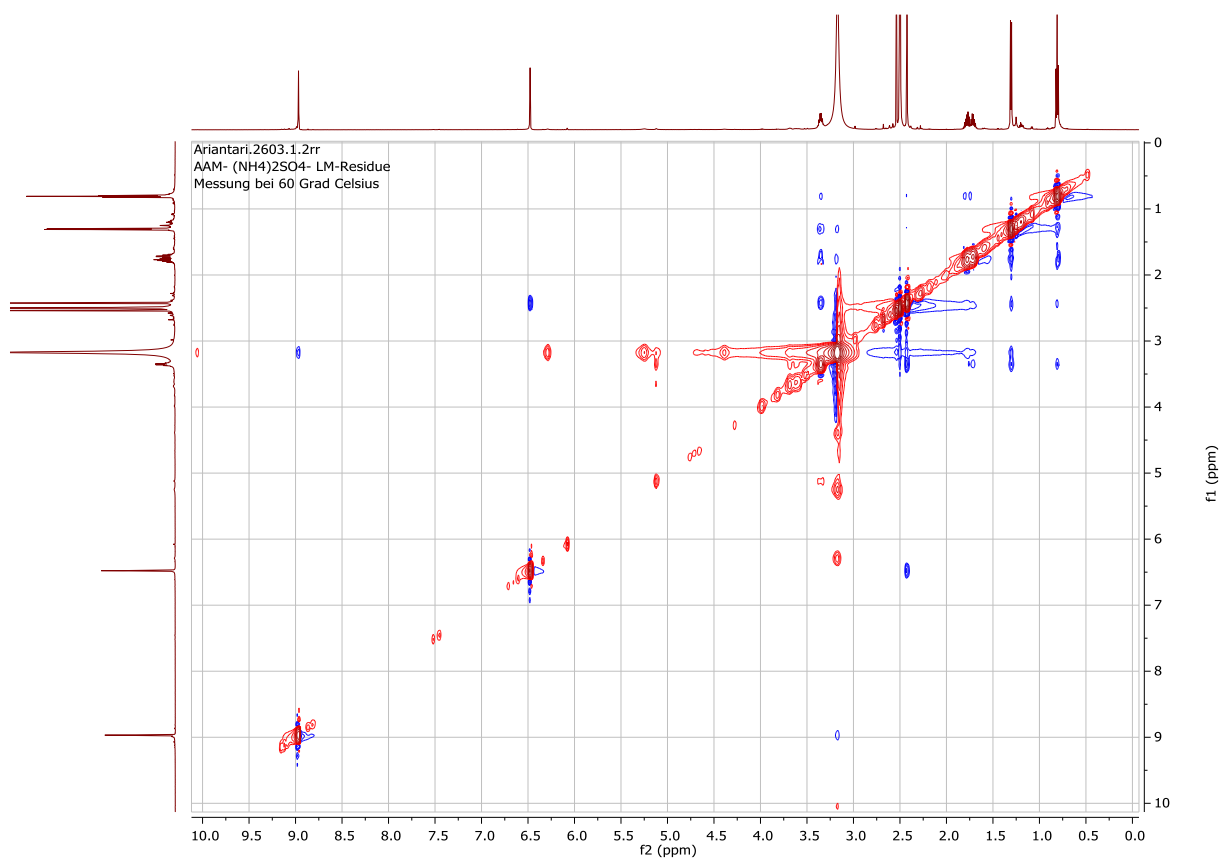

**Figure S28.** NOESY (600 MHz, DMSO- $d_6$ ) spectrum of compound **11**.



**Table S1.**  $^1\text{H}$  and  $^{13}\text{C}$  NMR data<sup>a</sup> (DMSO-*d*<sub>6</sub>) for compound **11**

| position | $\delta_{\text{C}}$ , type <sup>b</sup> | $\delta_{\text{H}}$ ( <i>J</i> in Hz)        |
|----------|-----------------------------------------|----------------------------------------------|
| 1        | 140.3, CH                               | 8.97, s                                      |
| 3        | 148.7, C                                |                                              |
| 4        | 123.7, C                                |                                              |
| 4a       | 141.3, C                                |                                              |
| 5        | 94.9, CH                                | 6.48, s                                      |
| 6        | nd <sup>c</sup>                         |                                              |
| 7        | 101.2, C                                |                                              |
| 8        | 168.3, C                                |                                              |
| 8a       | 113.1, C                                |                                              |
| 9        | 35.9, CH                                | 3.35, m                                      |
| 10       | 27.9, CH <sub>2</sub>                   | 1.78, dt (14.0, 7.0)<br>1.71, dt (14.0, 7.3) |
| 11       | 11.4, CH <sub>3</sub>                   | 0.81, t (7.3)                                |
| 12       | 18.7, CH <sub>3</sub>                   | 1.31, d (7.0)                                |
| 13       | 13.0, CH <sub>3</sub>                   | 2.43, s                                      |
| 14       | 174.4, C                                |                                              |

<sup>a</sup> Recorded at 600 MHz ( $^1\text{H}$ ) and 150 MHz ( $^{13}\text{C}$ ) at 60°C.

<sup>b</sup> Chemical shifts were extracted from HSQC and HMBC.

<sup>c</sup> not detected
